# Supplementary material for: Mechanistic and evolutionary insights into isoform-specific ‘supercharging’ in DCLK family kinases
Source: eLife journal article supplement (doi:10.7554/elife.87958), 2023-06-01
Supplement: fig2-data1 [file elife-87958-fig2-data1-v1.pdf]

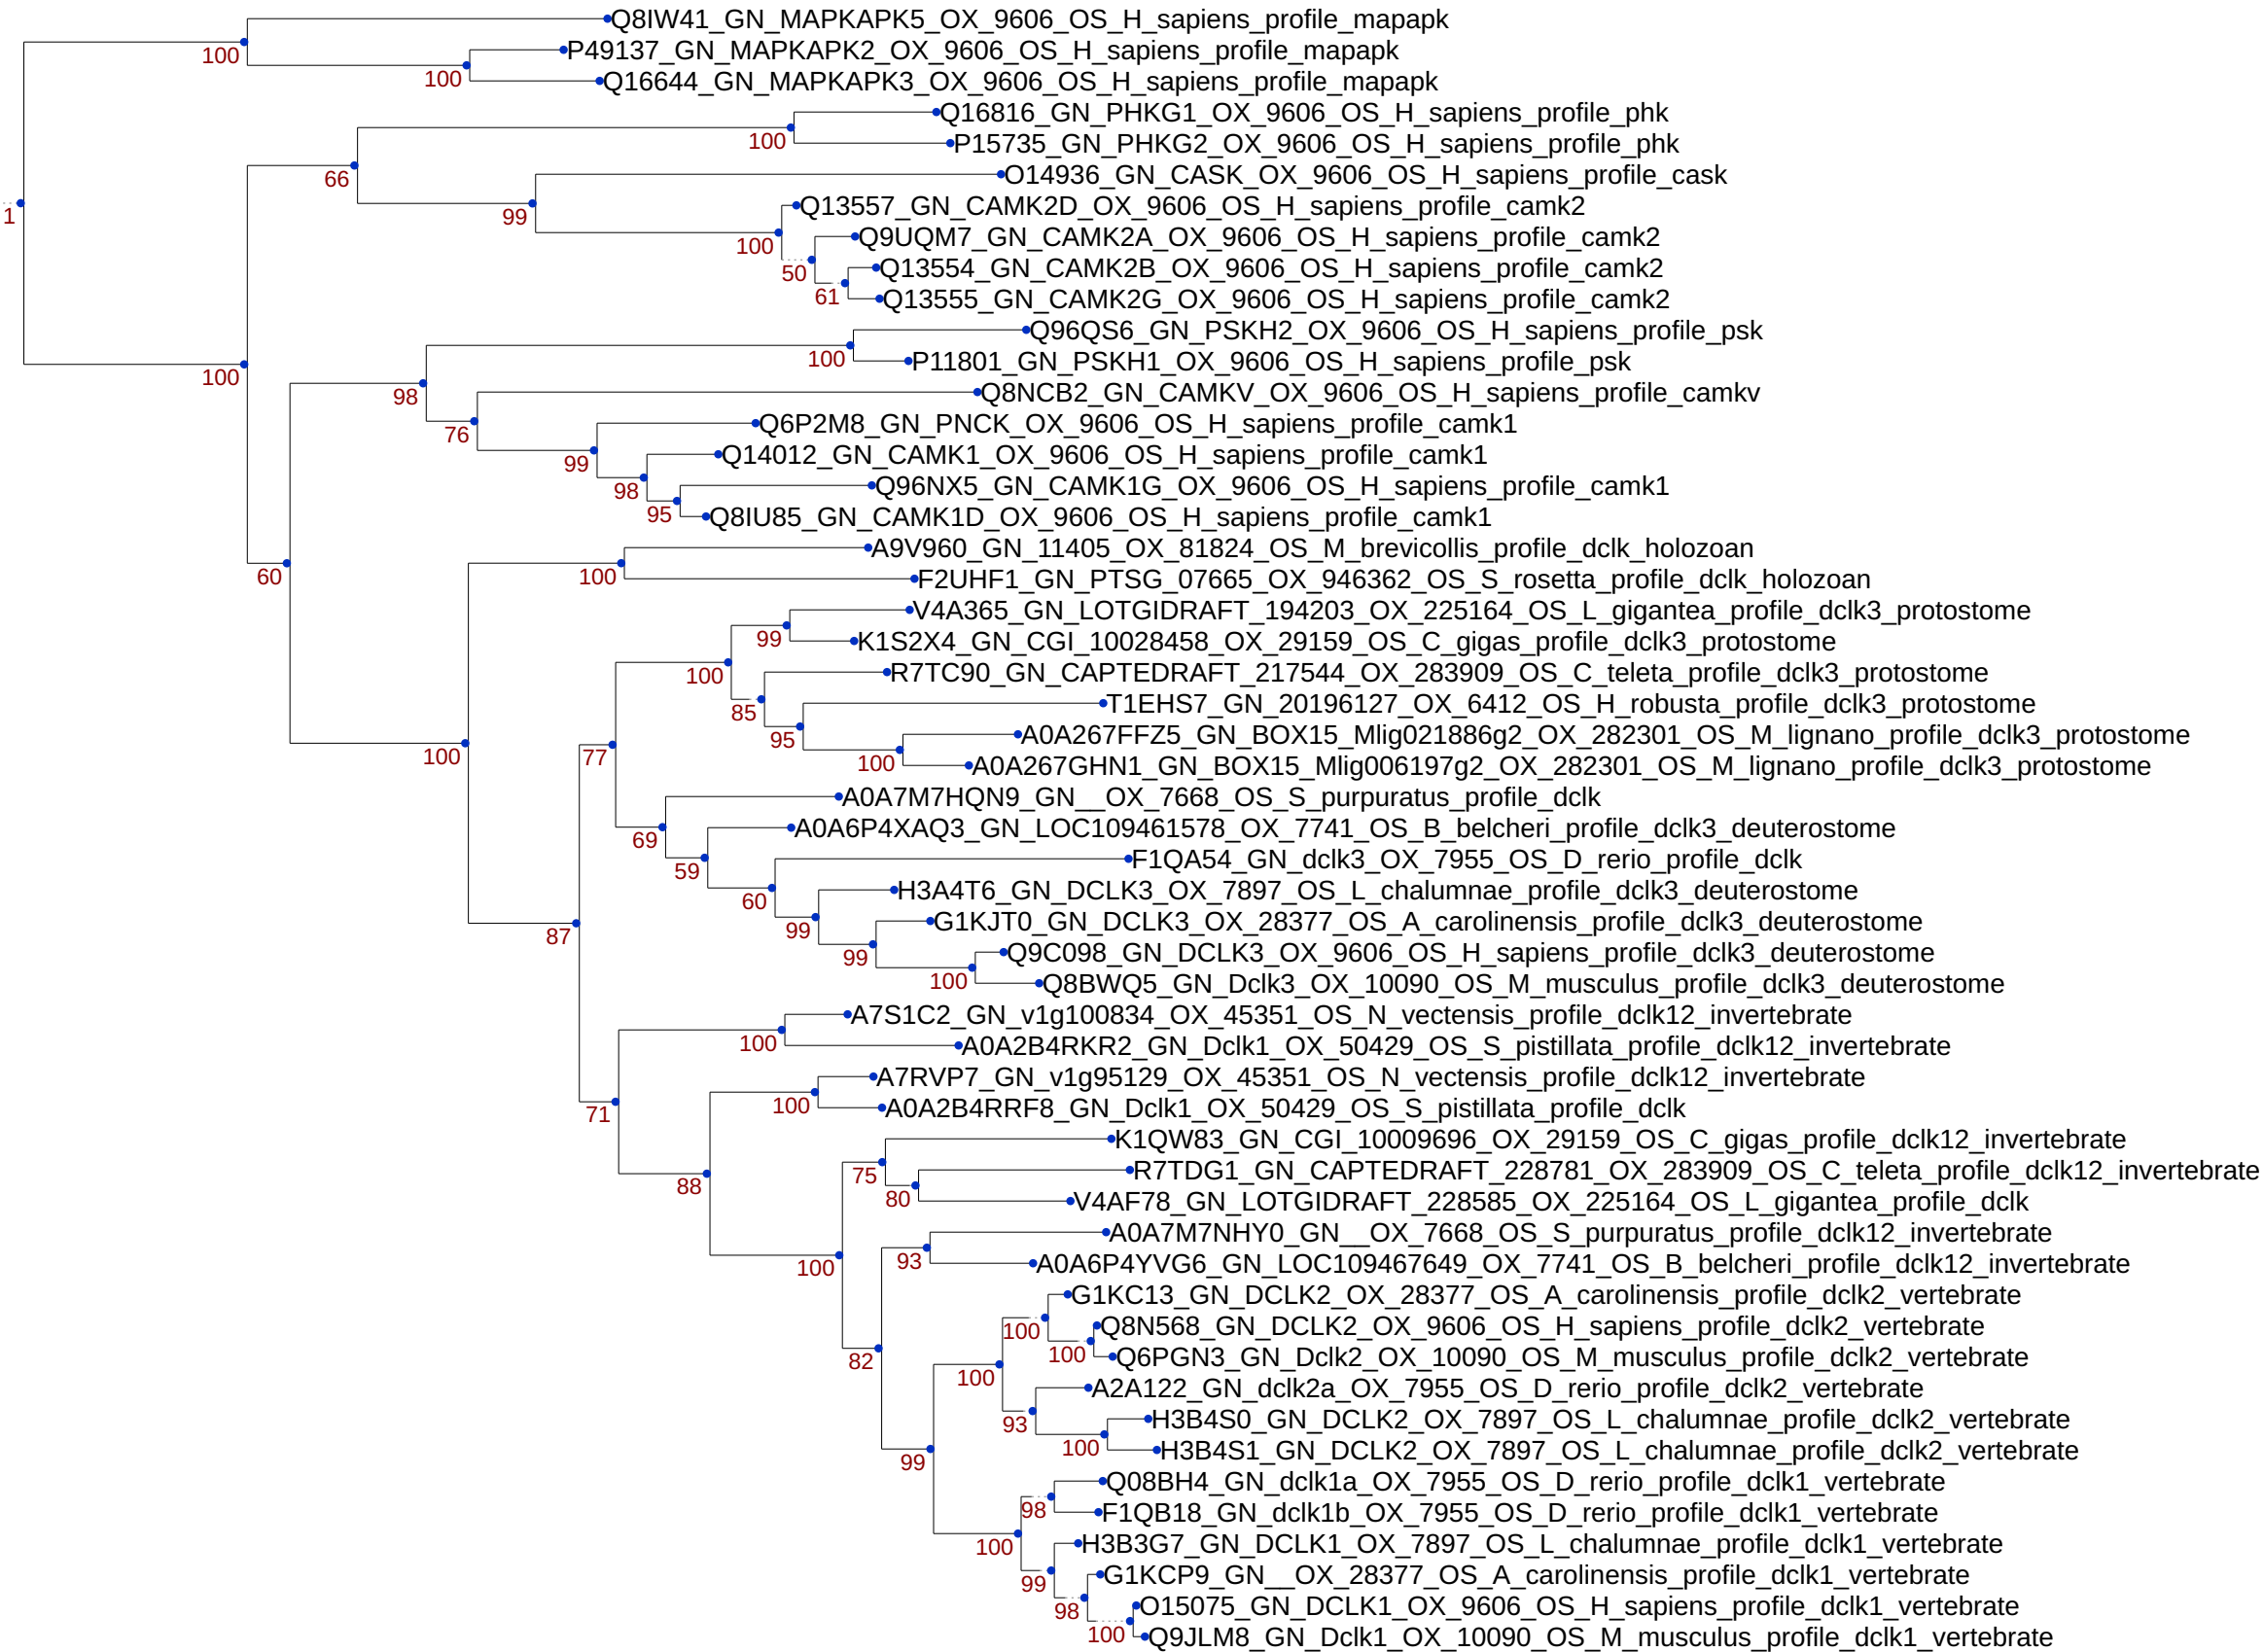

0.2
