# Supplementary material for: Mechanistic and evolutionary insights into isoform-specific ‘supercharging’ in DCLK family kinases
Source: eLife. 2023 Oct 26;12:RP87958. doi: 10.7554/eLife.87958 (PMC10602587; doi:10.7554/eLife.87958)
Supplement: Figure 2—source data 2. [file elife-87958-fig2-data2.xlsx]

## Sheet: Sheet1
					D1		D2		CD
		uniprot		DCLK3
	Snail	V4A365		L. gigantea
	Oyster	K1S2X4		C. gigas
	Leech	T1EHS7		H. robusta
	Annelid	R7TC90		C. teleta
	Flatworm	A0A267FFZ5		M. lignano
	Snail	A0A6P4XAQ3		B. belcheri
	Coelacanth	H3A4T6		L. Chalumnae
	Lizard	G1KJT0		A. carolinensis
	Fish	F1QA54		D. rerio
	Mouse	Q8BWQ5		M. musculus
	Human	Q9C098		H. sapiens
				DCLK1/2
	Anemone	A7S1C2		N. vectensis
	Sea Urchin	A0A7M7NHY0		S. purpuratus
	Oyster	K1QW83		C. gigas
	Annelid	R7TDG1		C. teleta
	Snail	A0A6P4YVG6		B. belcheri
	Coral	A0A2B4RKR2		S. pistillata
				DCLK2
	Coelacanth	H3B4S1		L. chalumnae
	Lizard	G1KC13		A. carolinensis
	Fish	A2A122		D. rerio
	Mouse	Q6PGN3		M. musculus
	Human	Q8N568		H. sapiens
				DCLK1
	Coelacanth	H3B3G7		L. chalumnae
	Lizard	G1KZ24		A. carolinensis
	Fish	F1QB18		D. rerio
	Mouse	Q9JLM8		M. musculus
	Human	O15075		H. sapiens
