# Supplementary material for: Mechanistic and evolutionary insights into isoform-specific ‘supercharging’ in DCLK family kinases
Source: eLife. 2023 Oct 26;12:RP87958. doi: 10.7554/eLife.87958 (PMC10602587; doi:10.7554/eLife.87958)
Supplement: Figure 3—source data 1. [file elife-87958-fig3-data1.xlsx]

## Sheet: Sheet1
	Common Name	DCLK1.1	DCLK1.2	ΔDCLK1.1	ΔDCLK1.2
	Human	O15075-2	O15075-1	O15075-3	O15075-4
	Chimpanzee	A0A6D2YBG1	A0A6D2XGR1	A0A2J8MLJ5	A0A6D2W199
	Gorilla	G3SIT0	A0A2I2Y344		G3QUA9
	Macaque	A0A5F8ABD1	F7CZB2		A0A1D5R4Y2
	Mouse		Q9JLM8
	Rat	A0A1W2Q6Q2	A0A3Q9WS43		O08875
	Panda	A0A7N5JPF3	G1LDC0		G1LDC1
	Dog	A0A8I3QQX4	A0A8I3QHP2	A0A8I3S6Z2
	Cat	M3W1P2	A0A2I2V2K4	A0A2I2UI09
	Whale	A0A8C0I5J5	A0A8B8VS22		A0A8C0E1L0
	Cow	A0A4W2I2A2	A0A4W2HY54	A0A4W2I271
	Pig	A0A286ZLR2	A0A286ZWQ7	A0A287ATC8	A0A8D1XNF9
	Horse	F7C3P7	A0A3Q2IDI2	A0A3Q2ID05
	Rhino		A0A673LNT9
	Bat	A0A7E6CJP4	A0A6J2MS06	A0A7E6CLM0	A0A7E6CJJ0
