# Supplementary material for: Mechanistic and evolutionary insights into isoform-specific ‘supercharging’ in DCLK family kinases
Source: eLife. 2023 Oct 26;12:RP87958. doi: 10.7554/eLife.87958 (PMC10602587; doi:10.7554/eLife.87958)
Supplement: Figure 3—source data 2. [file elife-87958-fig3-data2.xlsx]

## Sheet: Figure 3C_left DCLK1 WT ATPkm
	[ATP]	1	2	3	4	5	6
	1000	0.001887	0.002266	0.002207	0.002017	0.001623	0.001593
	333.333	0.001666	0.001723	0.002052	0.00196	0.001306	0.001448
	111.111	0.001527	0.001235	0.001512	0.0016	0.001005	0.001026
	37.037	0.001138	0.001217	0.001218	0.001012	0.000816	0.0008
	12.3457	0.000731	0.000886	0.000911	0.00082	0.000691	0.000362
	4.11523	0.000646	0.000665	0.000593	0.000596	0.000381	0.000413
	1.37174	0.000369	0.000327	0.000335	0.000308	-4.1e-05	0.000259
	0.457247	0.000175	0.000349	0.000192	0.000317	0.000149	0.000163
	0.152416	0.000102	0.000138	0.000163	0.000118	0.000108	7.95e-05
	0	5.95e-05	-0.00013	6.79e-05	4.36e-05	2.83e-05	1.46e-05

## Sheet: Figure 3C_right DCLK-In-1
	Time (min)	Buffer				DCLK1-IN-1
	1.48833	12.78	12.03	12.6	12.93	3.07	3.2	2.94	3.44
	4.17167	24.92	23.83	24.64	24.77	3.35	3.23	3.11	3.82
	6.94167	35.89	35	35.52	35.56	3.78	3.27	3.27	3.83
	9.605	44.68	44.08	44.58	44.44	3.85	3.55	3.46	3.92
	12.3017	52.53	51.87	52.38	52.42	3.97	3.78	3.4	4.27
	15.0433	60.09	59.06	59.33	58.92	4.33	3.71	3.71	4.22
	17.7483	65.95	65.18	65.32	64.78	4.57	3.68	3.6	4.37
	20.4333	71.06	70.18	70.37	69.95	4.75	3.82	3.78	4.67
	23.115	75.39	74.68	75.08	74.3	4.96	3.92	4.21	4.74
	25.7967	79.1	78.54	78.63	77.97	4.95	4.17	4.16	5.13

## Sheet: Figure 3D_left DCLK1 WT
Temperature	ATP (1mM)	ATP (1mM)	ATP (1mM) + MgCl2 (10mM)	ATP (1mM) + MgCl2 (10mM)	Buffer	Buffer
25
25.3								Normalised values
25.6
25.9
26.2
26.5
26.8
27.1
27.4
27.7
28
28.3
28.6
28.9
29.2
29.5
29.8
30.1
30.4
30.7
31
31.3
31.6
31.9
32.2
32.5
32.8
33.1	0	0	0	0	0	0
33.4	0.143835	0.189408	0.114998	0.0721496	0.209625	0.188778
33.7	0.305458	0.39664	0.24193	0.152822	0.442158	0.399487
34	0.487293	0.625143	0.382073	0.242956	0.70085	0.635048
34.3	0.691779	0.878253	0.53676	0.343442	0.987094	0.897717
34.6	0.921686	1.15861	0.708798	0.455124	1.30277	1.18947
34.9	1.18062	1.46859	0.901703	0.578882	1.6514	1.51185
35.2	1.47189	1.81033	1.11748	0.716507	2.0363	1.86687
35.5	1.79855	2.18682	1.35897	0.87046	2.4612	2.25755
35.8	2.16351	2.60225	1.62902	1.04296	2.93142	2.68825
36.1	2.57023	3.06095	1.9285	1.23631	3.45265	3.16357
36.4	3.02244	3.56765	2.25673	1.4532	4.02925	3.688
36.7	3.52417	4.12756	2.61391	1.69687	4.66395	4.26578
37	4.07935	4.74578	3.00255	1.9705	5.35874	4.90159
37.3	4.69256	5.42707	3.42525	2.27717	6.11798	5.60093
37.6	5.3705	6.17666	3.88533	2.61945	6.94808	6.37142
37.9	6.1213	7.00071	4.38622	3.00014	7.85476	7.22193
38.2	6.95364	7.9067	4.93291	3.42268	8.84396	8.1599
38.5	7.87635	8.90237	5.53235	3.89113	9.92388	9.19121
38.8	8.89721	9.99504	6.19132	4.40968	11.1039	10.3226
39.1	10.0224	11.1921	6.91673	4.98353	12.3914	11.5622
39.4	11.2586	12.5013	7.71449	5.61883	13.7931	12.9172
39.7	12.6153	13.9302	8.59036	6.32176	15.317	14.3938
40	14.1026	15.4862	9.54887	7.0994	16.9702	15.9986
40.3	15.7287	17.1771	10.5958	7.95936	18.7611	17.7383
40.6	17.5031	19.012	11.7372	8.91013	20.6995	19.6199
40.9	19.4362	21.0006	12.9766	9.95989	22.7949	21.6517
41.2	21.5383	23.1519	14.3199	11.1174	25.0534	23.8415
41.5	23.8187	25.4733	15.7748	12.3926	27.4789	26.1969
41.8	26.2841	27.968	17.3485	13.797	30.0692	28.725
42.1	28.9359	30.6374	19.0508	15.3416	32.8195	31.4305
42.4	31.773	33.4812	20.8934	17.0372	35.7298	34.3124
42.7	34.7911	36.4962	22.8838	18.8943	38.8001	37.3638
43	37.9858	39.6759	25.0258	20.9226	42.0236	40.5742
43.3	41.3456	43.0089	27.3213	23.1303	45.3888	43.9286
43.6	44.8513	46.4776	29.7716	25.5199	48.8786	47.4083
43.9	48.4792	50.0584	32.3751	28.0905	52.4686	50.9903
44.2	52.2011	53.7244	35.1271	30.8377	56.1279	54.6473
44.5	55.981	57.4446	38.0159	33.7556	59.8163	58.3487
44.8	59.7767	61.1832	41.0267	36.8362	63.4895	62.0573
45.1	63.5459	64.8987	44.1532	40.0688	67.1113	65.7318
45.4	67.2483	68.5478	47.3839	43.439	70.6481	69.3287
45.7	70.8419	72.0884	50.7	46.9272	74.0628	72.8044
46	74.2822	75.4803	54.0792	50.5093	77.3188	76.1183
46.3	77.5255	78.6867	57.5018	54.1583	80.3814	79.2354
46.6	80.5275	81.6736	60.9468	57.8456	83.2133	82.1274
46.9	83.2555	84.4111	64.3921	61.5403	85.7857	84.7696
47.2	85.6916	86.8765	67.8058	65.2093	88.082	87.1411
47.5	87.8311	89.0559	71.1526	68.8169	90.0965	89.2324
47.8	89.6786	90.9471	74.3962	72.3233	91.8346	91.0436
48.1	91.2451	92.5572	77.4977	75.6868	93.3135	92.5854
48.4	92.549	93.8991	80.42	78.8671	94.5492	93.8775
48.7	93.6137	94.9925	83.1323	81.8279	95.5601	94.947
49	94.4744	95.864	85.6071	84.5373	96.373	95.8232
49.3	95.1761	96.547	87.8229	86.9736	97.018	96.535
49.6	95.7635	97.0801	89.7682	89.1272	97.5261	97.1112
49.9	96.2717	97.5036	91.4439	90.9986	97.9297	97.5811
50.2	96.7368	97.8554	92.8656	92.5947	98.2613	97.9732
50.5	97.193	98.1699	94.0589	93.9318	98.5507	98.3121
50.8	97.6665	98.4782	95.0485	95.034	98.8218	98.6204
51.1	98.176	98.8039	95.8567	95.933	99.0927	98.9232
51.4	98.731	99.1612	96.5135	96.6631	99.3743	99.2443
51.7	99.337	99.5584	97.0588	97.2571	99.6759	99.601
52	100	100	97.5217	97.7453	100	100
52.3			97.9272	98.1548
52.6			98.2986	98.51
52.9			98.6547	98.8327
53.2			99.0039	99.1385
53.5			99.3452	99.4345
53.8			99.6761	99.7225
54.1			100	100
54.4
54.7
55
55.3
55.6
55.9
56.2
56.5
56.8
57.1
57.4
57.7
58
58.3
58.6
58.9
59.2
59.5
59.8
60.1
60.4
60.7
61
61.3
61.6
61.9
62.2
62.5
62.8
63.1
63.4
63.7
64
64.3
64.6
64.9
65.2
65.5
65.8
66.1
66.4
66.7
67
67.3
67.6
67.9
68.2
68.5
68.8
69.1
69.4
69.7
70
70.3
70.6
70.9
71.2
71.5
71.8
72.1
72.4
72.7
73
73.3
73.6
73.9
74.2
74.5
74.8
75.1
75.4
75.7
76
76.3
76.6
76.9
77.2
77.5
77.8
78.1
78.4
78.7
79
79.3
79.6
79.9
80.2
80.5
80.8
81.1
81.4
81.7
82
82.3
82.6
82.9
83.2
83.5
83.8
84.1
84.4
84.7
85
85.3
85.6
85.9
86.2
86.5
86.8
87.1
87.4
87.7
88
88.3
88.6
88.9
89.2
89.5
89.8
90.1
90.4
90.7
91
91.3
91.6
91.9
92.2
92.5
92.8
93.1
93.4
93.7
94
94.3
94.6
94.9

## Sheet: Figure 3D_right DCLK1(D533A)
Temperature	ATP (1mM)	ATP (1mM)	ATP (1mM) + MgCl2(10mM)	ATP (1mM) + MgCl2(10mM)	Buffer	Buffer
25
25.3								Normalised values
25.6
25.9
26.2
26.5
26.8
27.1
27.4
27.7
28
28.3
28.6
28.9
29.2
29.5
29.8
30.1
30.4
30.7
31
31.3
31.6
31.9
32.2
32.5	0.0748727	0.00109557	0.0720296	0.155306	0	0.233186
32.8	0.0545733	0.000273893	0.0506306	0.12373	0.00407496	0.185762
33.1	0.0373483	0	0.0323041	0.0952807	0.0121951	0.14116
33.4	0.0233334	0.0011647	0.0175598	0.0694068	0.0235996	0.101316
33.7	0.0125883	0.00421866	0.00701039	0.0466341	0.0375614	0.0676769
34	0.00493218	0.00989516	0.00111491	0.0280289	0.053664	0.0407392
34.3	0.000546797	0.0189249	0	0.0144602	0.0724423	0.0207531
34.6	0	0.0324577	0.00353147	0.0056214	0.0945002	0.00732989
34.9	0.00455878	0.0513353	0.0112682	0.000639573	0.120251	0.000390689
35.2	0.0154938	0.0756007	0.0228171	0	0.15071	0
35.5	0.0337381	0.105334	0.0386181	0.00501405	0.186863	0.00641052
35.8	0.059644	0.140666	0.0595602	0.0161202	0.229216	0.0187979
36.1	0.0931005	0.181808	0.0864343	0.033248	0.277828	0.0359021
36.4	0.133699	0.228686	0.119959	0.0582949	0.332863	0.0572395
36.7	0.180907	0.281498	0.161036	0.0926209	0.395008	0.0844264
37	0.234657	0.341565	0.210672	0.135666	0.465631	0.119864
37.3	0.295654	0.410956	0.269927	0.18816	0.545908	0.165992
37.6	0.365293	0.491744	0.340114	0.251142	0.637626	0.22523
37.9	0.445176	0.585562	0.422682	0.325811	0.743166	0.299782
38.2	0.536736	0.693999	0.51937	0.413623	0.864053	0.391312
38.5	0.64194	0.818869	0.632124	0.516001	1.00158	0.501958
38.8	0.763065	0.961495	0.763089	0.63392	1.15752	0.63398
39.1	0.902415	1.12314	0.914686	0.769879	1.33476	0.788759
39.4	1.06296	1.30617	1.08962	0.92749	1.53631	0.968139
39.7	1.24934	1.5135	1.29098	1.11138	1.76515	1.17559
40	1.46622	1.74905	1.52276	1.32696	2.02484	1.41508
40.3	1.71778	2.01699	1.78948	1.57945	2.31876	1.69113
40.6	2.00875	2.32256	2.09635	1.87441	2.65105	2.00969
40.9	2.34477	2.67098	2.44909	2.21697	3.02723	2.37729
41.2	2.73208	3.06732	2.85356	2.61112	3.45426	2.80068
41.5	3.17716	3.51695	3.31585	3.06103	3.94058	3.28705
41.8	3.68665	4.0253	3.84251	3.57482	4.49634	3.84372
42.1	4.26782	4.59924	4.44151	4.1624	5.13256	4.47935
42.4	4.92877	5.24678	5.12102	4.83248	5.8584	5.20336
42.7	5.67764	5.97591	5.88847	5.59409	6.6812	6.02439
43	6.52209	6.79421	6.75158	6.4564	7.60955	6.95103
43.3	7.46958	7.71056	7.71901	7.42857	8.65202	7.99253
43.6	8.52788	8.73361	8.80036	8.51741	9.81773	9.15847
43.9	9.70551	9.87397	10.006	9.73114	11.1153	10.4574
44.2	11.0132	11.143	11.3457	11.0781	12.5548	11.8995
44.5	12.4623	12.5505	12.8284	12.5667	14.1478	13.4981
44.8	14.0636	14.1061	14.4632	14.2115	15.904	15.2652
45.1	15.828	15.82	16.2602	16.0261	17.8326	17.2091
45.4	17.7665	17.7035	18.2305	18.0184	19.9416	19.3376
45.7	19.8902	19.7696	20.3869	20.2001	22.2395	21.6594
46	22.2098	22.0304	22.7427	22.5817	24.7344	24.1844
46.3	24.7353	24.4972	25.3087	25.1717	27.4365	26.9212
46.6	27.4752	27.1788	28.0924	27.9822	30.357	29.8748
46.9	30.4348	30.081	31.0987	31.0209	33.5018	33.048
47.2	33.6153	33.2081	34.3308	34.2914	36.8719	36.4367
47.5	37.0164	36.5599	37.7875	37.7884	40.4636	40.0329
47.8	40.6333	40.1311	41.4609	41.4968	44.262	43.8238
48.1	44.4511	43.9113	45.3359	45.3931	48.2422	47.7921
48.4	48.4452	47.8808	49.3899	49.4505	52.375	51.9168
48.7	52.5855	52.0103	53.5902	53.6315	56.6238	56.1677
49	56.8361	56.258	57.8915	57.8873	60.9409	60.5019
49.3	61.1534	60.5756	62.2391	62.1716	65.2695	64.8635
49.6	65.4849	64.9079	66.5728	66.4331	69.548	69.1863
49.9	69.7694	69.197	70.8304	70.616	73.7129	73.3961
50.2	73.9367	73.3798	74.9472	74.6599	77.698	77.4214
50.5	77.9175	77.3914	78.8582	78.5037	81.4399	81.1948
50.8	81.6509	81.1739	82.5027	82.0926	84.8848	84.6594
51.1	85.082	84.6727	85.829	85.3758	87.9874	87.7725
51.4	88.1646	87.8359	88.7997	88.3129	90.7184	90.5052
51.7	90.8663	90.6197	91.3907	90.8825	93.0632	92.8415
52	93.1711	92.9992	93.5912	93.0835	95.021	94.7816
52.3	95.078	94.9712	95.4082	94.9293	96.6038	96.344
52.6	96.6044	96.5507	96.8631	96.4387	97.8355	97.5635
52.9	97.7853	97.7689	97.986	97.6318	98.7473	98.4818
53.2	98.6631	98.6676	98.8135	98.5351	99.3747	99.1425
53.5	99.2818	99.2932	99.3869	99.1829	99.7608	99.5904
53.8	99.6833	99.6947	99.7497	99.6169	99.9539	99.8628
54.1	99.909	99.9171	99.9423	99.8756	100	99.9919
54.4	100	100	100	99.9934	99.9331	100
54.7	99.9858	99.978	99.9522	100
55			99.8236
55.3
55.6
55.9
56.2
56.5
56.8
57.1
57.4
57.7
58
58.3
58.6
58.9
59.2
59.5
59.8
60.1
60.4
60.7
61
61.3
61.6
61.9
62.2
62.5
62.8
63.1
63.4
63.7
64
64.3
64.6
64.9
65.2
65.5
65.8
66.1
66.4
66.7
67
67.3
67.6
67.9
68.2
68.5
68.8
69.1
69.4
69.7
70
70.3
70.6
70.9
71.2
71.5
71.8
72.1
72.4
72.7
73
73.3
73.6
73.9
74.2
74.5
74.8
75.1
75.4
75.7
76
76.3
76.6
76.9
77.2
77.5
77.8
78.1
78.4
78.7
79
79.3
79.6
79.9
80.2
80.5
80.8
81.1
81.4
81.7
82
82.3
82.6
82.9
83.2
83.5
83.8
84.1
84.4
84.7
85
85.3
85.6
85.9
86.2
86.5
86.8
87.1
87.4
87.7
88
88.3
88.6
88.9
89.2
89.5
89.8
90.1
90.4
90.7
91
91.3
91.6
91.9
92.2
92.5
92.8
93.1
93.4
93.7
94
94.3
94.6
94.9
